# Supplementary material for: Cancer cell death induced by novel small molecules degrading the TACC3 protein via the ubiquitin–proteasome pathway
Source: PubMed Central journal article supplement (PMC4260729; doi:10.1038/cddis.2014.471), 2014-11-06

Supplementary Fig.S1

Immunoprecipitation with anti-Flag(TACC3)

Addition of KHS108 or Me-BS

A

Inherent interaction

excess amount of KHS108 or Me-BS

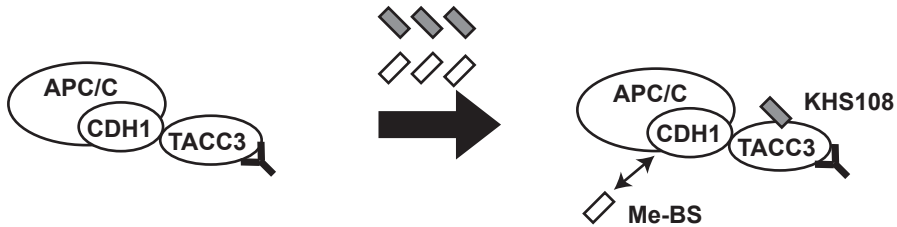

No effect

B

SNIPER(TACC3)-mediated interaction

excess amount of KHS108

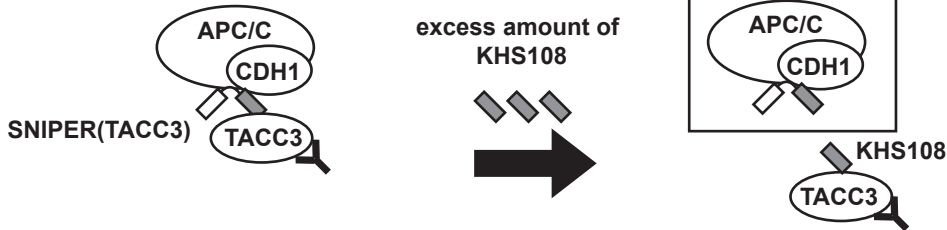

APC/C<sup>CDH1</sup> eluted

excess amount of Me-BS

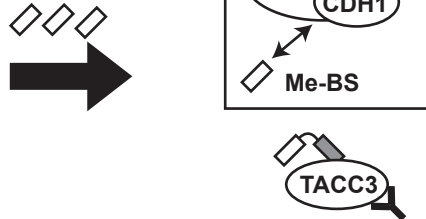

APC/C<sup>CDH1</sup> eluted

## Supplementary Fig.S2

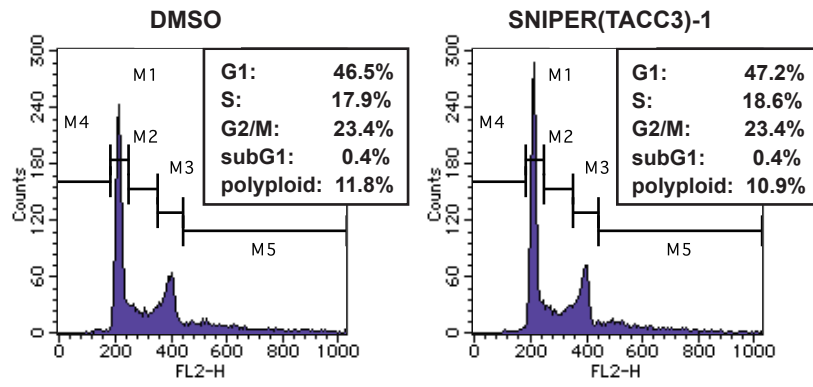

Supplementary Fig.S3

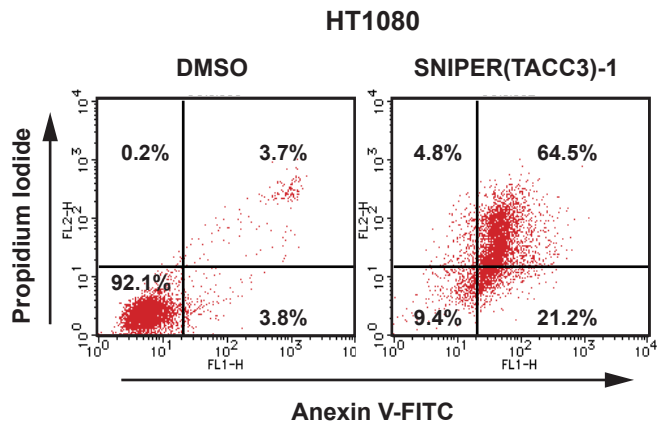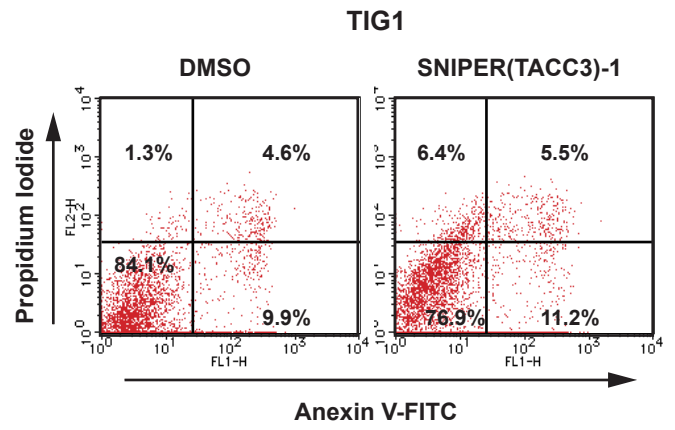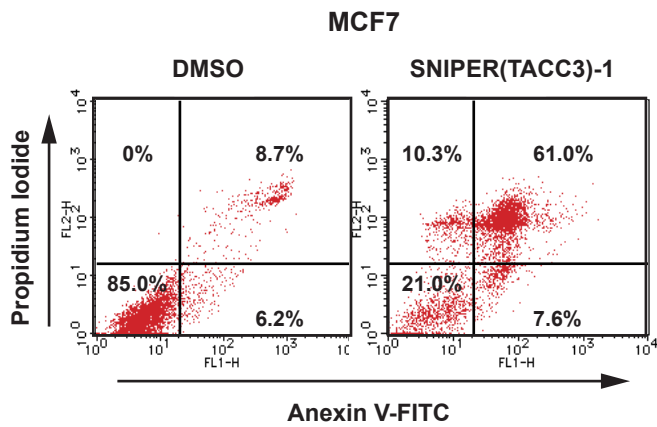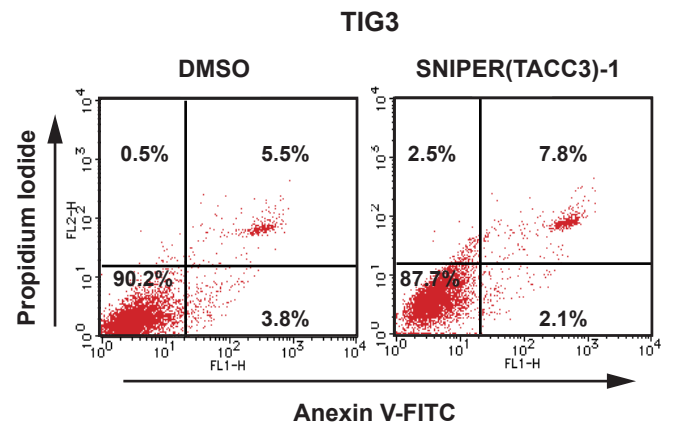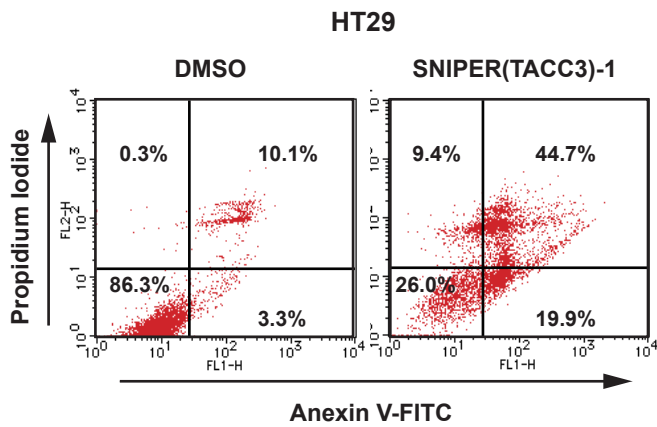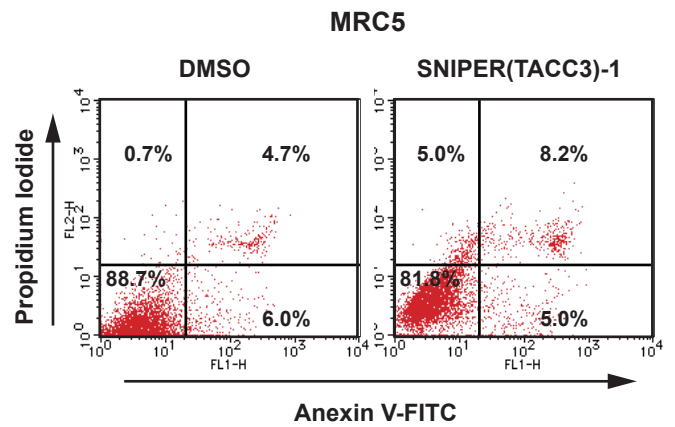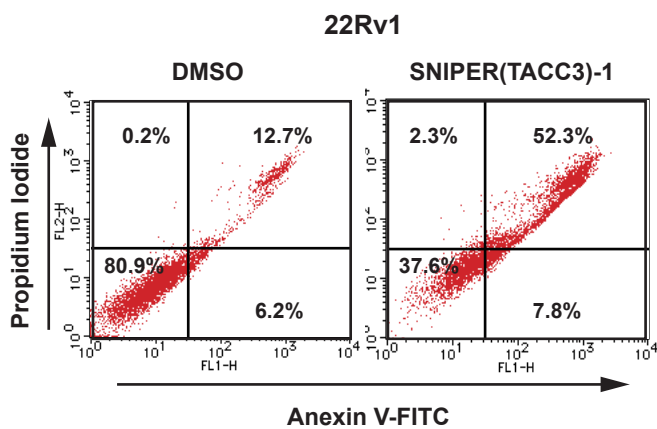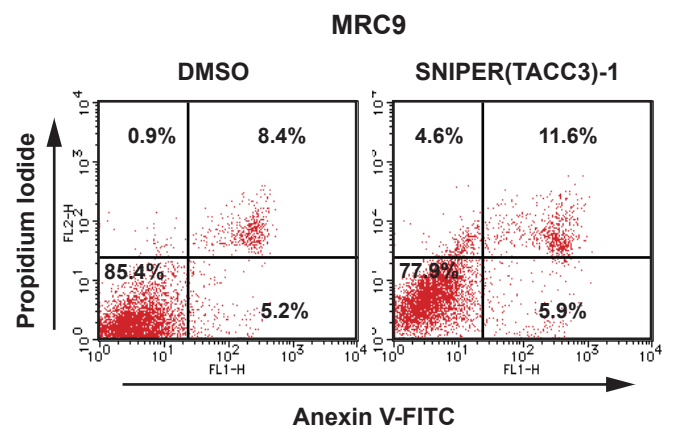

Supplementary Fig.S4

A

HT1080

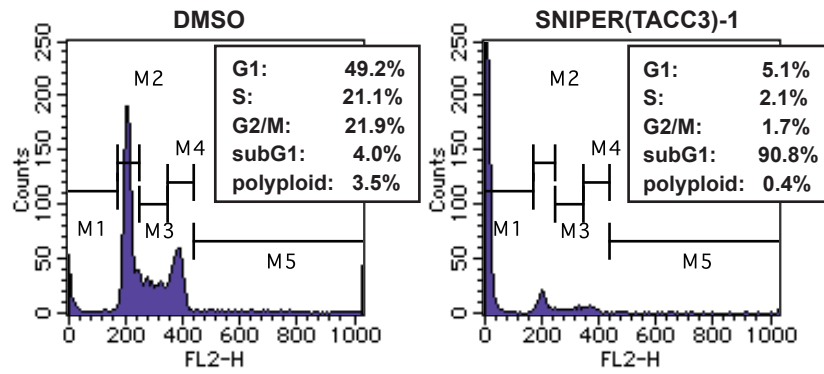

MCF7

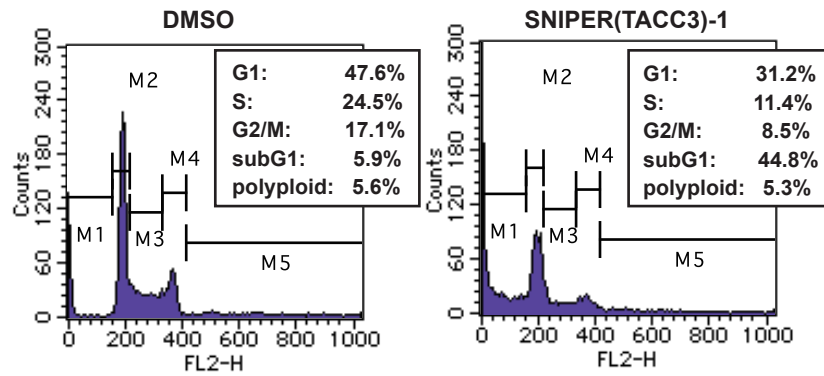

HT29

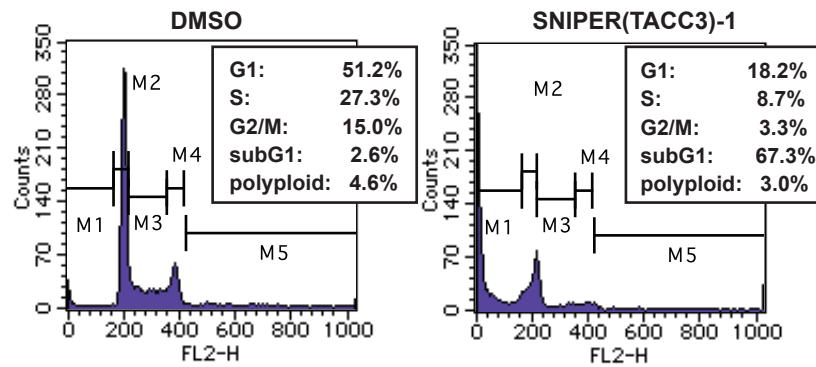

22Rv1

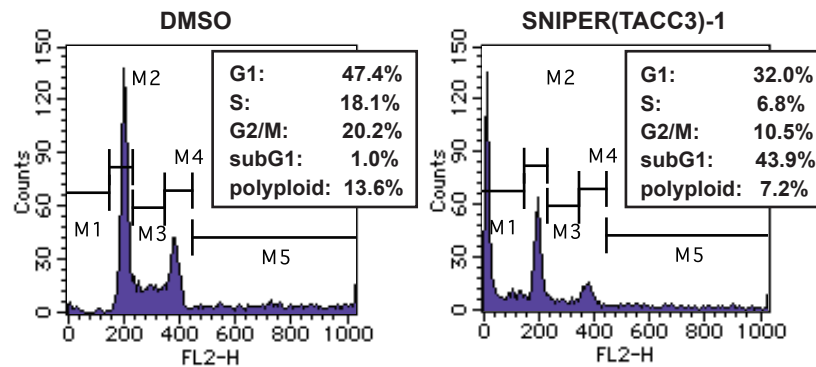

Supplementary Fig.S4

B

TIG1

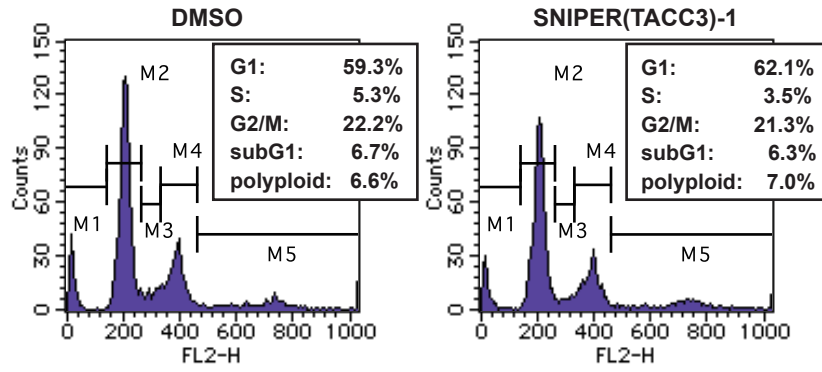

TIG3

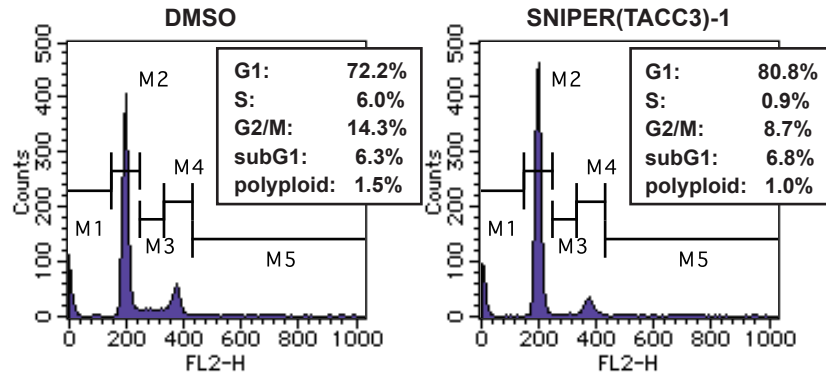

MRC5

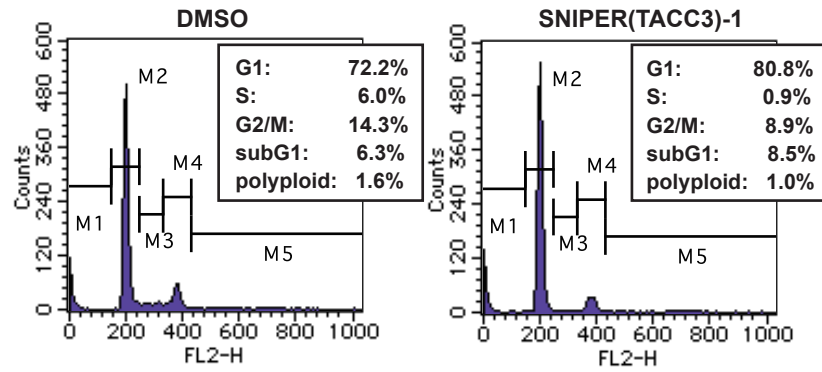

MRC9

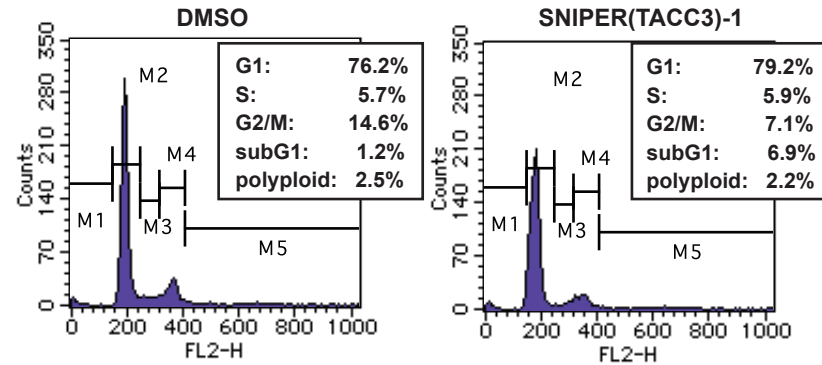

Supplementary Fig.S5

A

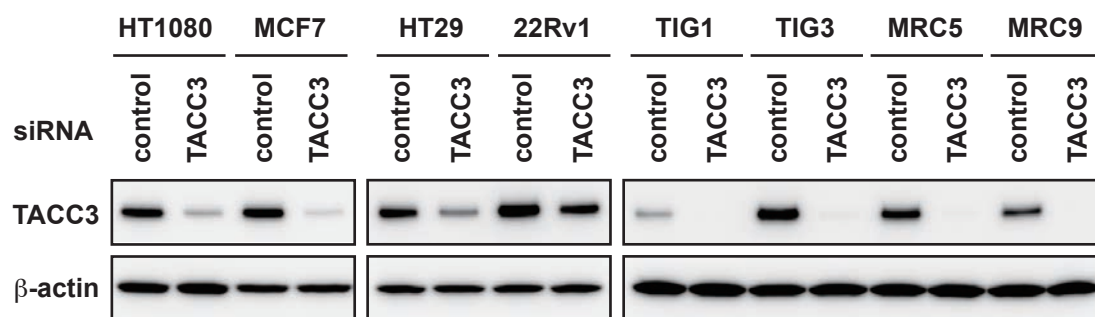

B

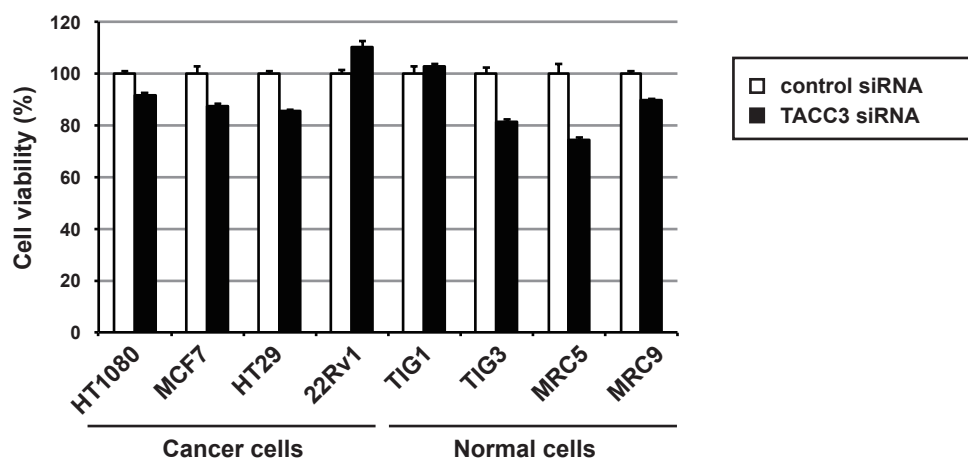

Supplementary Fig.S5

C

HT1080

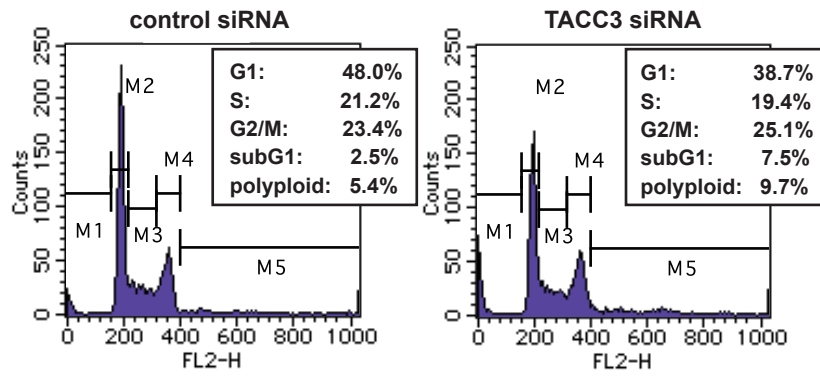

MCF7

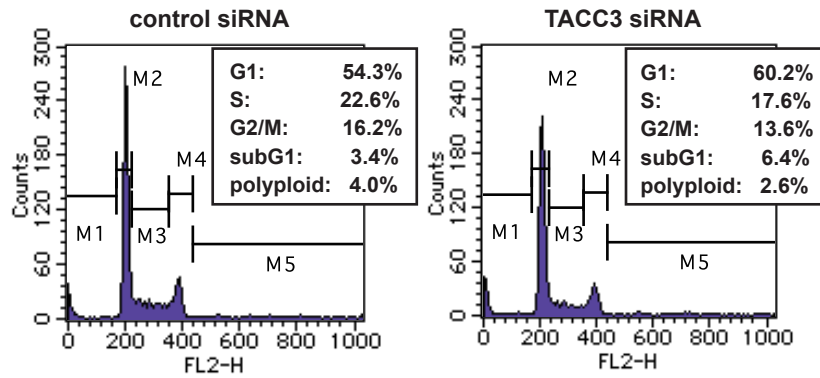

HT29

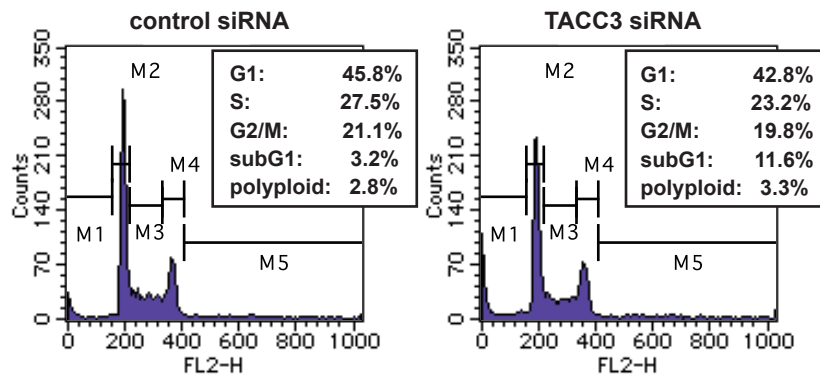

22Rv1

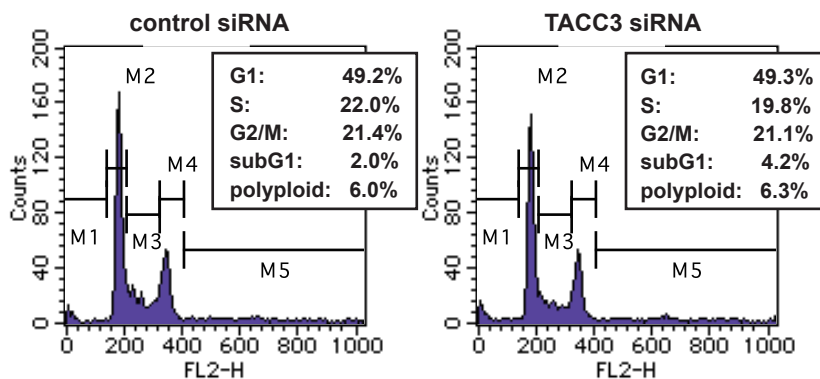

Supplementary Fig.S5

D

TIG1

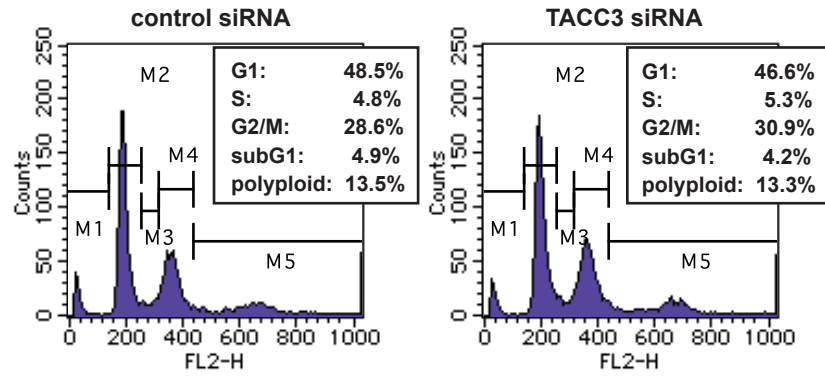

TIG3

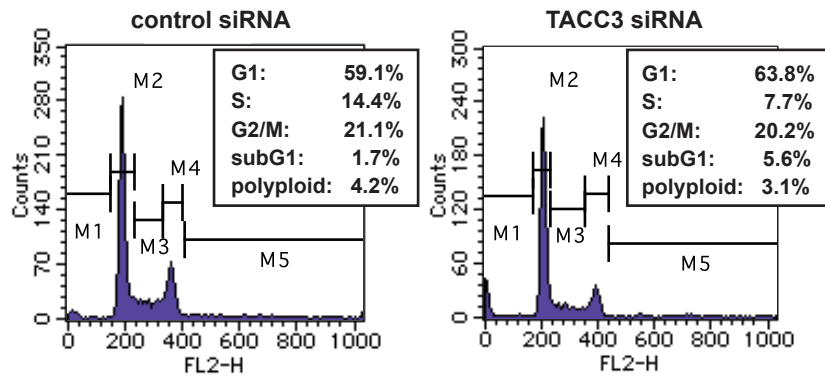

MRC5

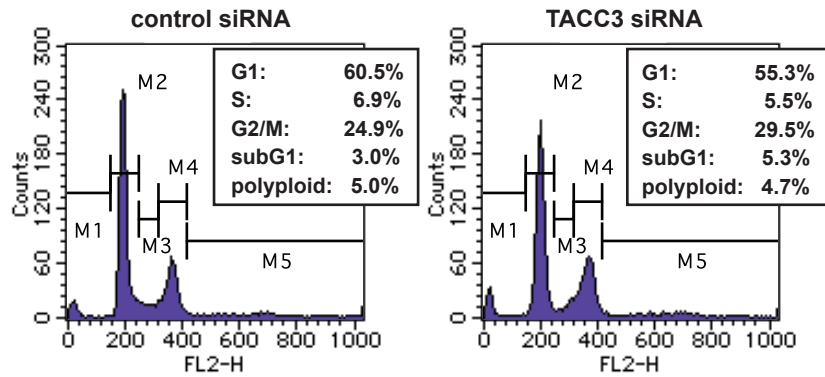

MRC9

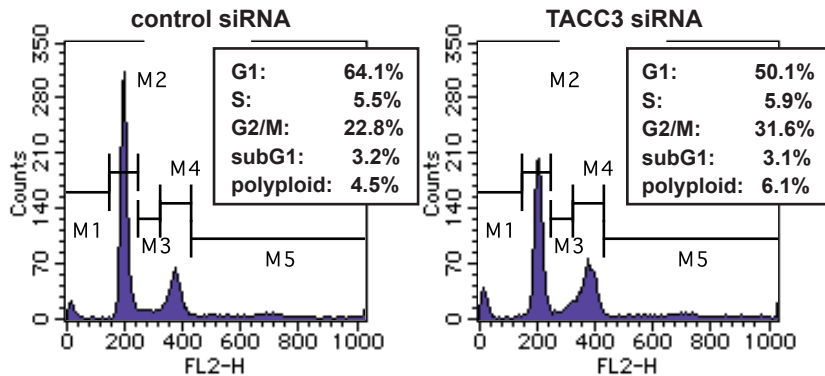



Supplementary Fig.S6

DMSO

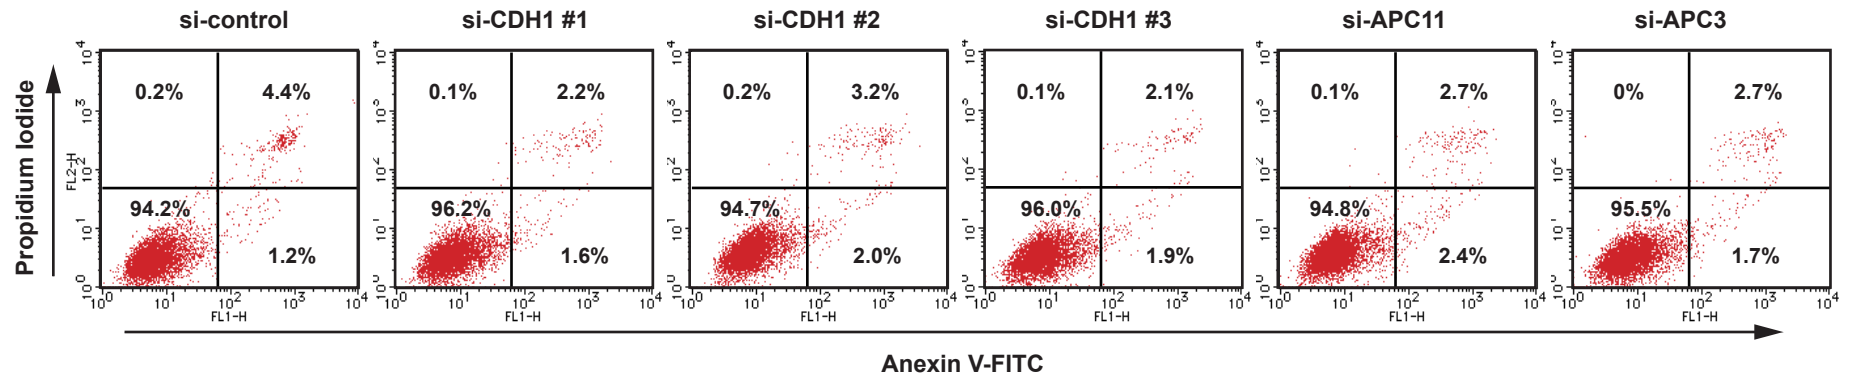

SNIPER(TACC3)-1

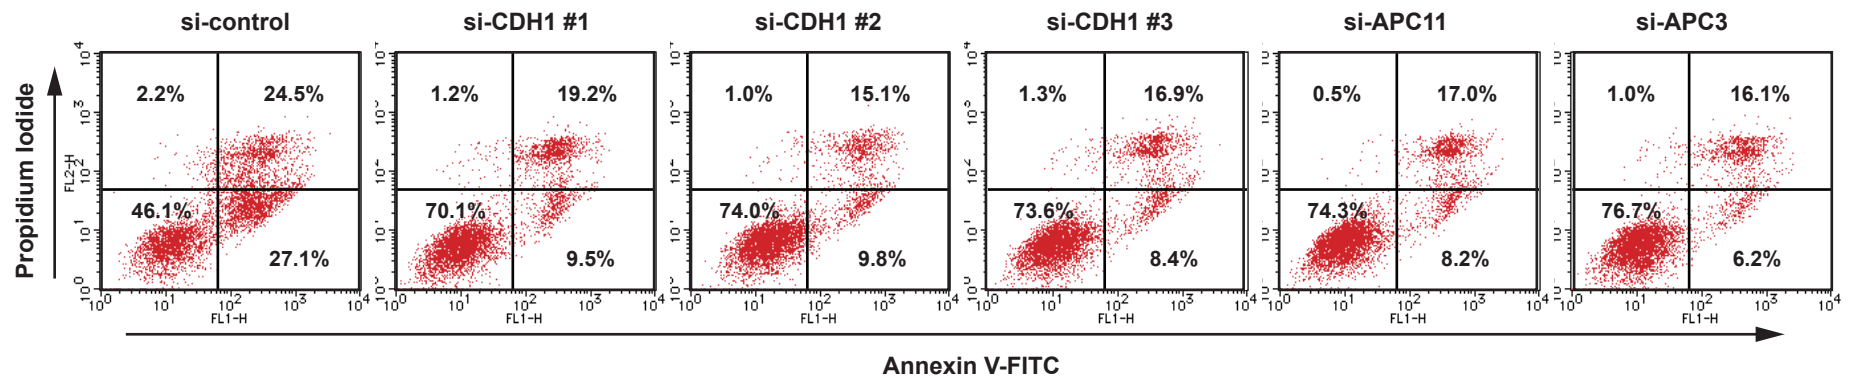

Supplement: cddis2014471x2.pdf [file cddis2014471x2.pdf]
